# Supplementary material
Source: PubMed Central journal article supplement (PMC3973085)
Supplement: JCI71812sd.pdf [file JCI71812sd.pdf]

## **SUPPLEMENTAL INFORMATION**

### **DLC1 Inhibits TGF $\beta$ -induced PTHLH Production and Breast Cancer**

#### **Osteolytic Metastasis**

Yufeng Wang, Rong Lei, Xueqian Zhuang, Ning Zhang, Hong Pan, Gang Li, Jing Hu, Xiaoqi Pan, Qian Tao, Da Fu, Jianru Xiao, Y. Eugene Chin, Yibin Kang, Qifeng Yang, Guohong Hu

Supplemental Information contains Supplemental Data (including 9 figures and 2 tables), Supplemental Experimental Procedures and Supplemental References.

## SUPPLEMENTAL FIGURES AND LEGENDS

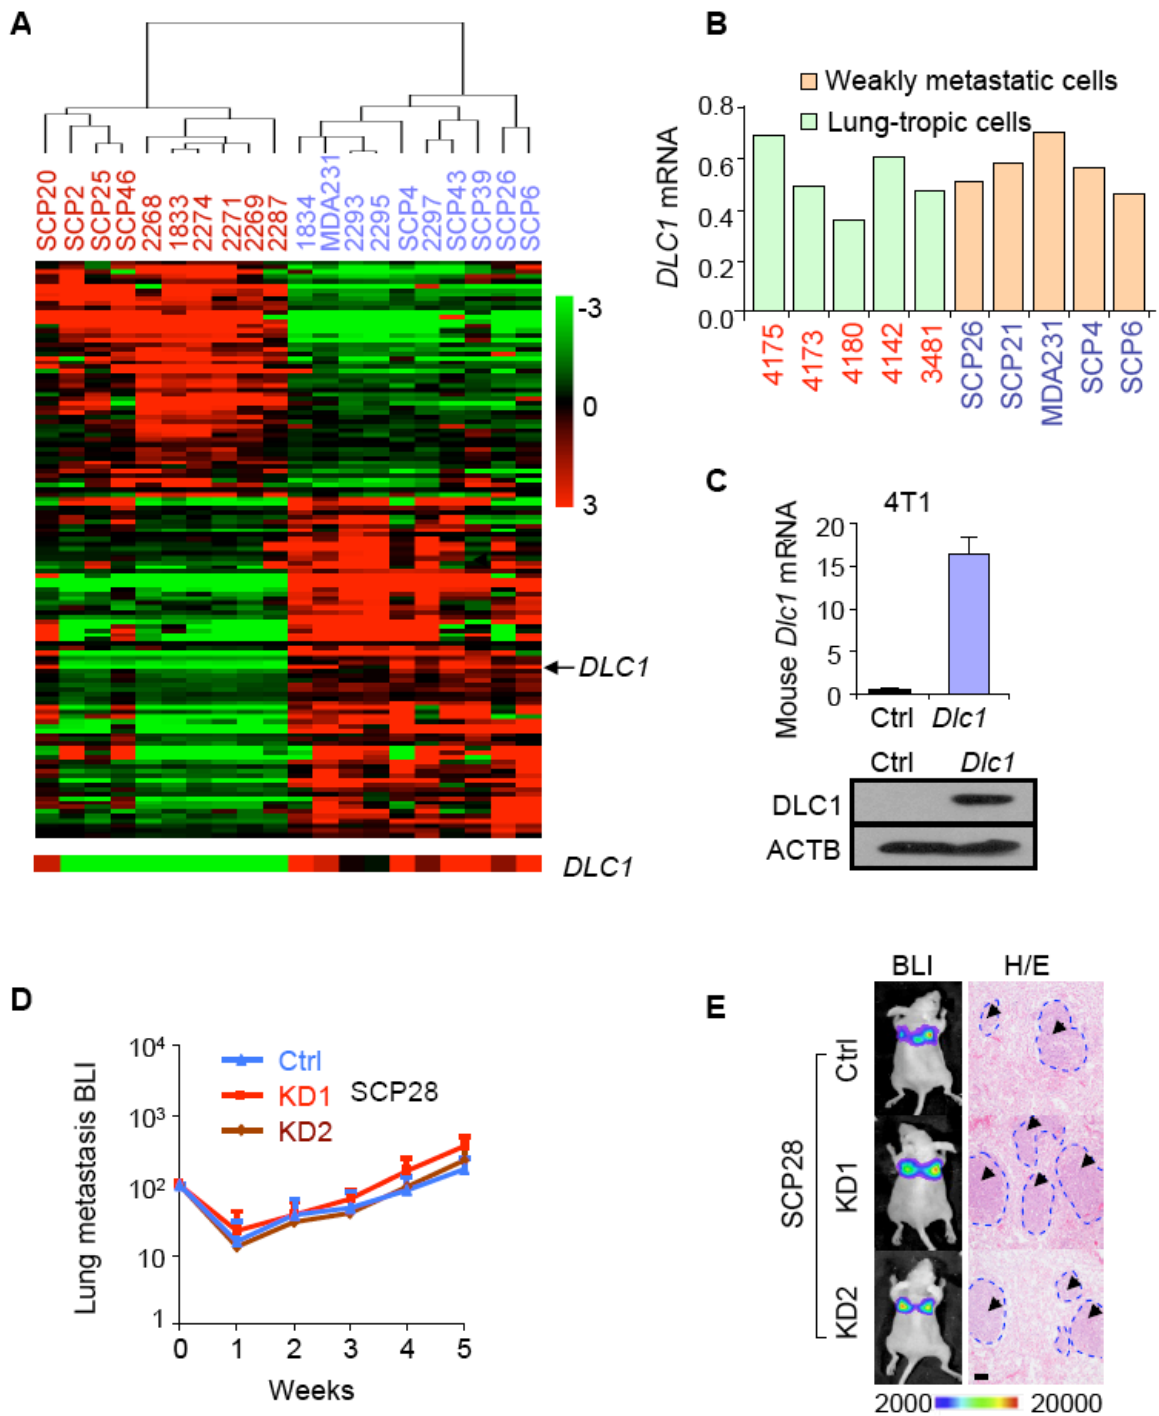

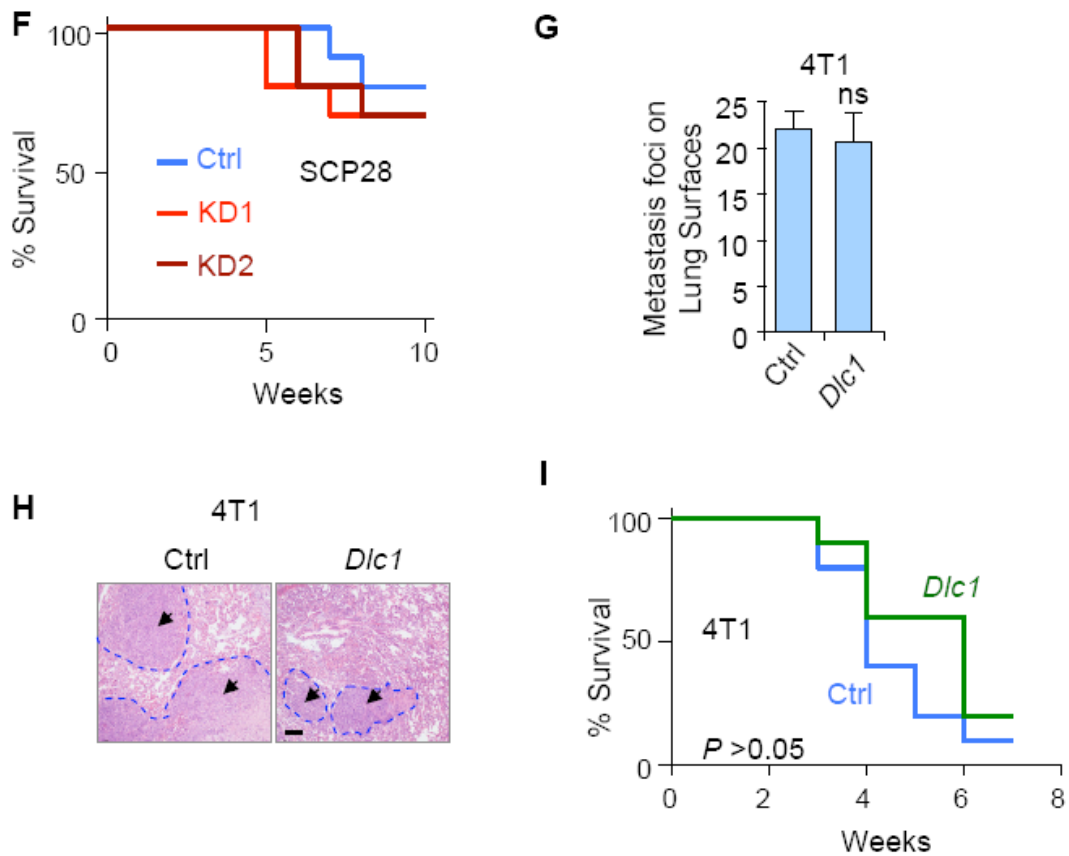

**Figure S1. *DLC1* expression and its metastasis function in breast cancer cell lines.** (A) Expression heatmap of the bone-metastasis signature genes (1) in MDA231 derivative cell lines organized by unsupervised clustering analysis. Green and red fonts denote cell lines with weak and strong bone-metastasis capabilities, respectively. (B) *DLC1* expression in MDA231 derivative cells with different lung metastatic capabilities. (C) *Dlc1* OE in 4T1. (D) BLI quantitation of lung metastasis from SCP28 cells with *DLC1* KD (n=10). (E) Representative BLI and H/E images of SCP28 lung metastasis. (F) Animal survival analysis of *DLC1* KD. (G) Metastasis foci on the lung surface of Balb/c mice injected with 4T1 cells of *Dlc1* OE (n=5). (H) H/E images of lung metastasis by 4T1 cells with *Dlc1* OE. (I) Animal survival analysis of *Dlc1* OE. Scale bar, 50  $\mu$ m.

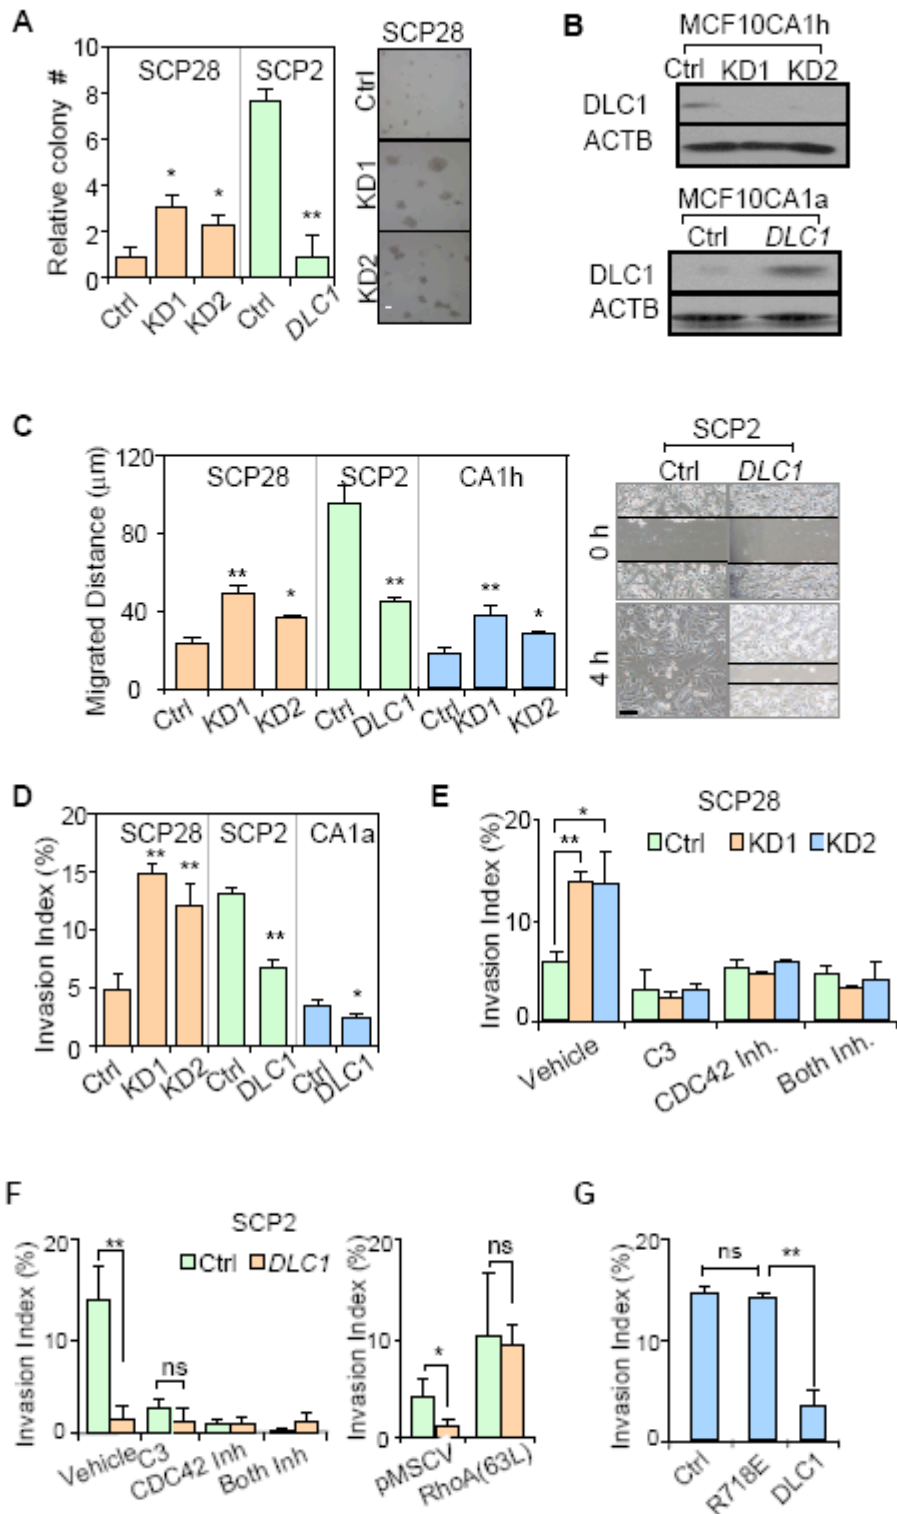

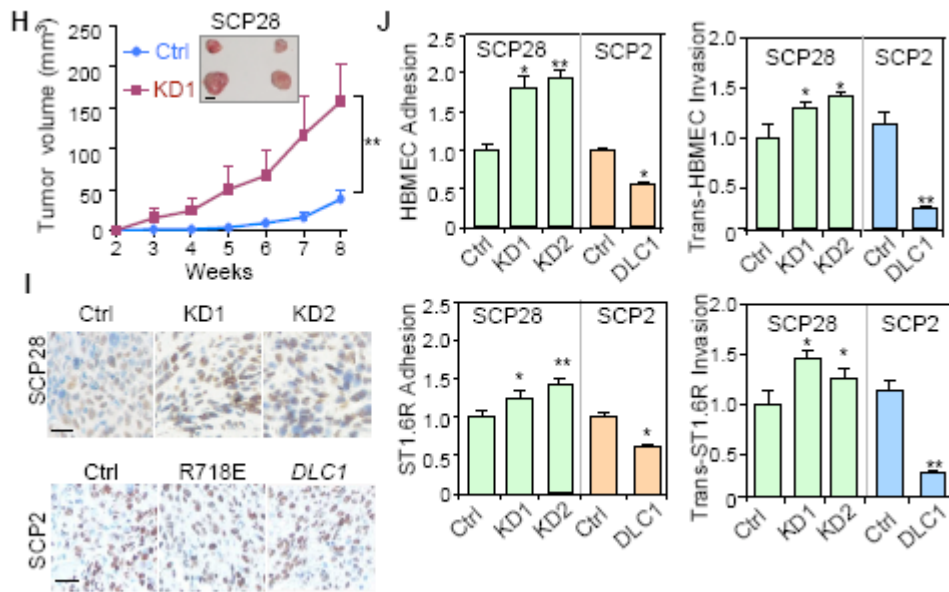

**Figure S2. DLC1-Rho signaling regulates the intrinsic malignancies of breast cancer cells. (A)** Soft-agar colony formation of cancer cells with *DLC1* KD and OE. Shown at the right are representative images (n=3). **(B)** *DLC1* KD and OE in MCF10CA1h and MCF10CA1a cells. **(C)** Wound-healing assays (n=3). **(D)** Transwell invasion assays (n=3). **(E)** Transwell invasion assays of SCP28 treated with inhibitors of small GTPases (n=3). **(F)** Transwell invasion assays of SCP2 cells with *DLC1* or RhoA(63L) OE, or treated with GTPase inhibitors (n=3). **(G)** Transwell invasion assays of SCP2 with wild type and mutant *DLC1* OE (n=3). **(H)** Primary tumor growth rates of SCP28 cells injected into mammary fat pads of nude mice (n=5). **(I)** Ki67 proliferation analysis of the SCP2 and SCP28 cells in bone metastasis tumors. **(J)** The abilities of cancer cells to adhere to (left) and invade through (right) the monolayer of bone endothelial (HBMEC-60) and lung endothelial (ST1.6R) cells. Data shown are relative to controls (n=3). Scale bar, 20  $\mu$ m. (A,C,I); 4 mm (H). \*  $P < 0.05$ ; \*\*  $P < 0.01$ .

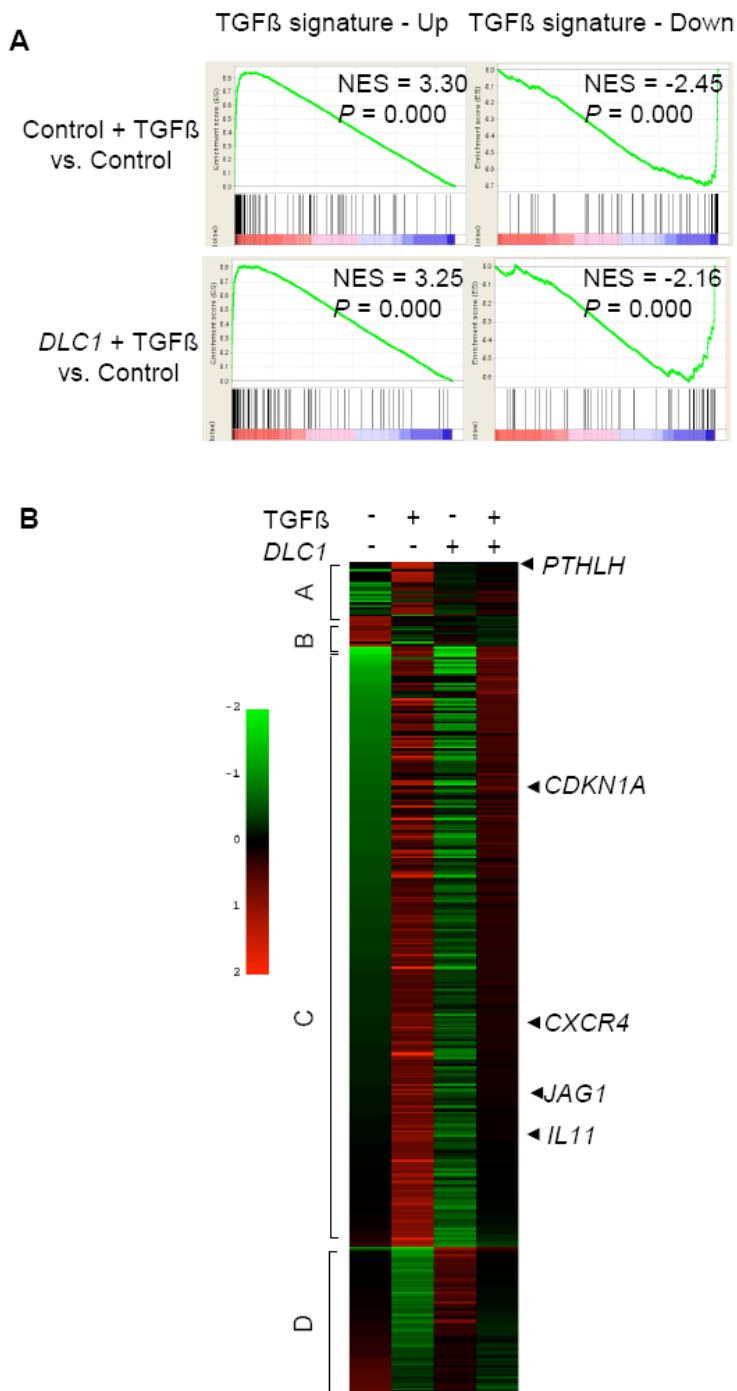

**Figure S3. Gene expression analyses of control SCP2 and *DLC1* OE cells with or without TGF $\beta$  treatment. (A) GSEA analyses of a TGF $\beta$ -responsive signature (2). (B) Expression heatmap of the genes regulated by TGF $\beta$  in SCP2 cells. Group A, up-regulated by TGF $\beta$  and reversed by *DLC1*; Group B, down-regulated by TGF $\beta$  and reversed by *DLC1*; Group C, up-regulated by TGF $\beta$ , but not reversed by *DLC1*; Group D, down-regulated by TGF $\beta$ , but not reversed by *DLC1*.**

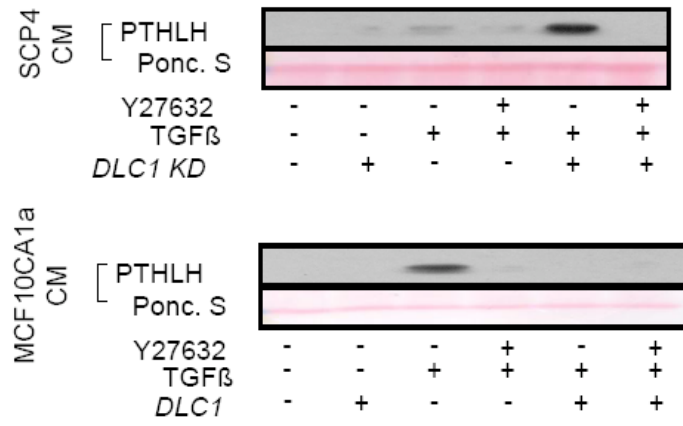

**Figure S4. DLC1 regulation of TGFβ-induced PTHLH production in SCP4 (top) and MCF10CA1a (bottom).**

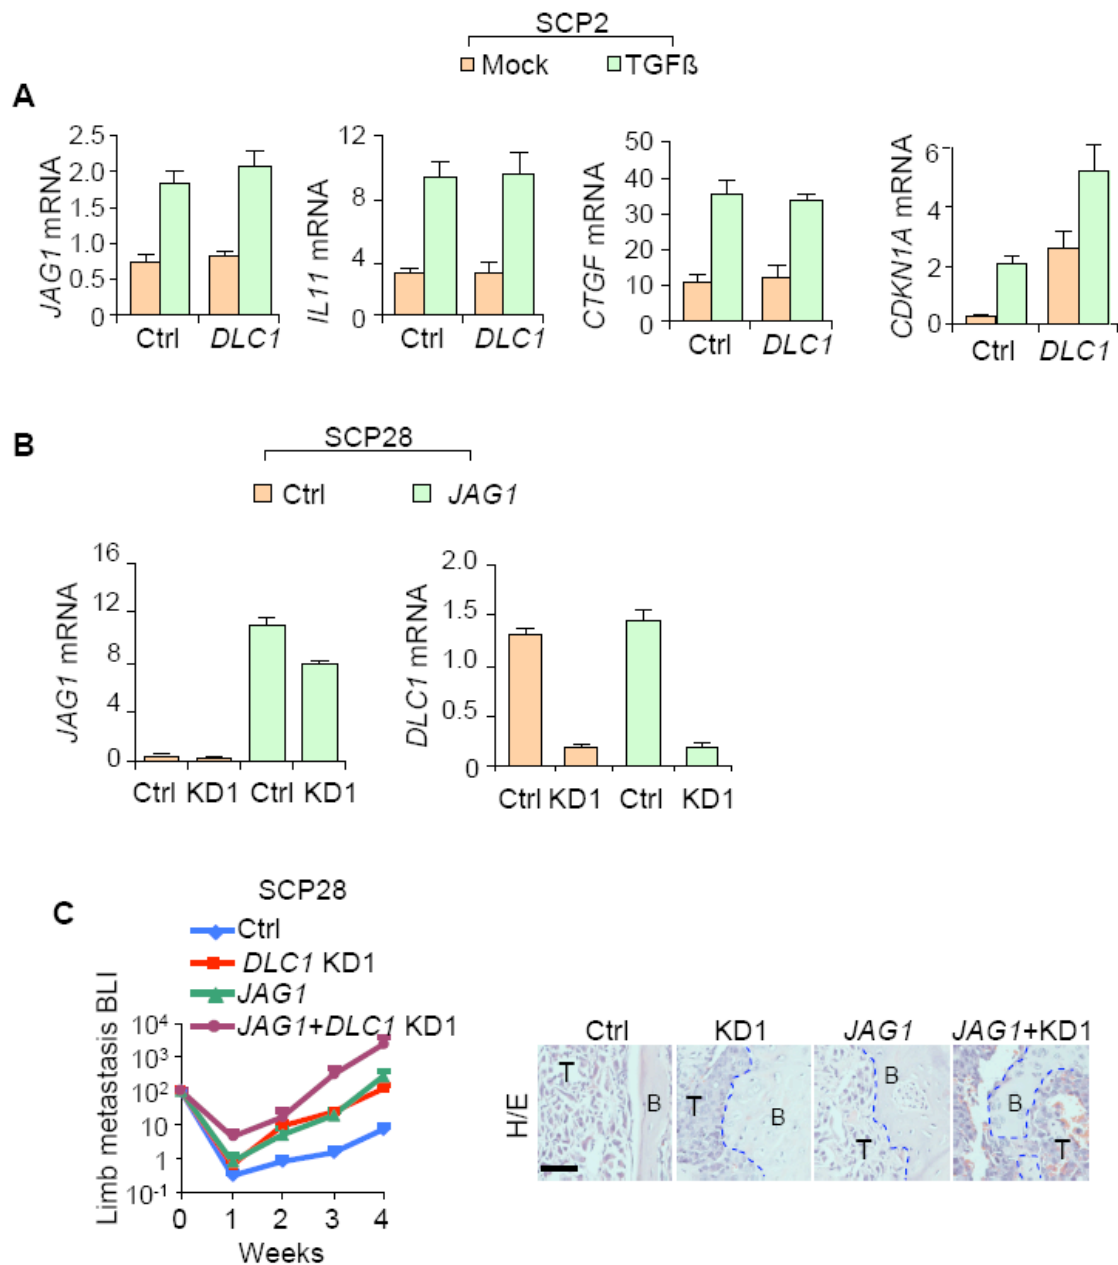

**Figure S5. The relationship of DLC1 with the JAG1/Notch pathway. (A)** DLC1 did not regulate TGFβ induction of other target genes including *JAG1*, *IL11*, *CTGF*, and *CDKN1A*. Shown are qPCR results (n=3). **(B)** qPCR analyses of *JAG1* and *DLC1* mRNA levels in SCP28 with *JAG1* OE, *DLC1* KD or both. The data showed that *DLC1* does not regulate the expression of *JAG1*, or vice versa (n=3). **(C)** In vivo bone metastasis of SCP28 cells with *JAG1* OE, *DLC1* KD or both. Shown are BLI quantitation (n=10) and H/E images. Scale bar, 50 μm.



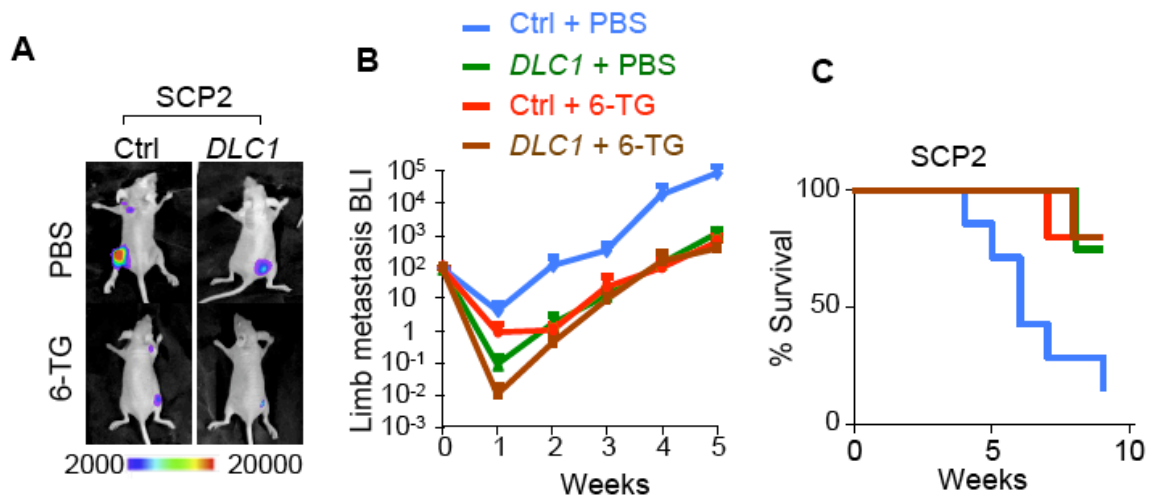

**Figure S6.** The effect of *DLC1 OE* in SCP2 cells on bone metastasis when the mice were treated with 6-TG. Shown are BLI images (**A**), BLI quantitation (**B**) and animal survival (**C**) of the mice (n=10).

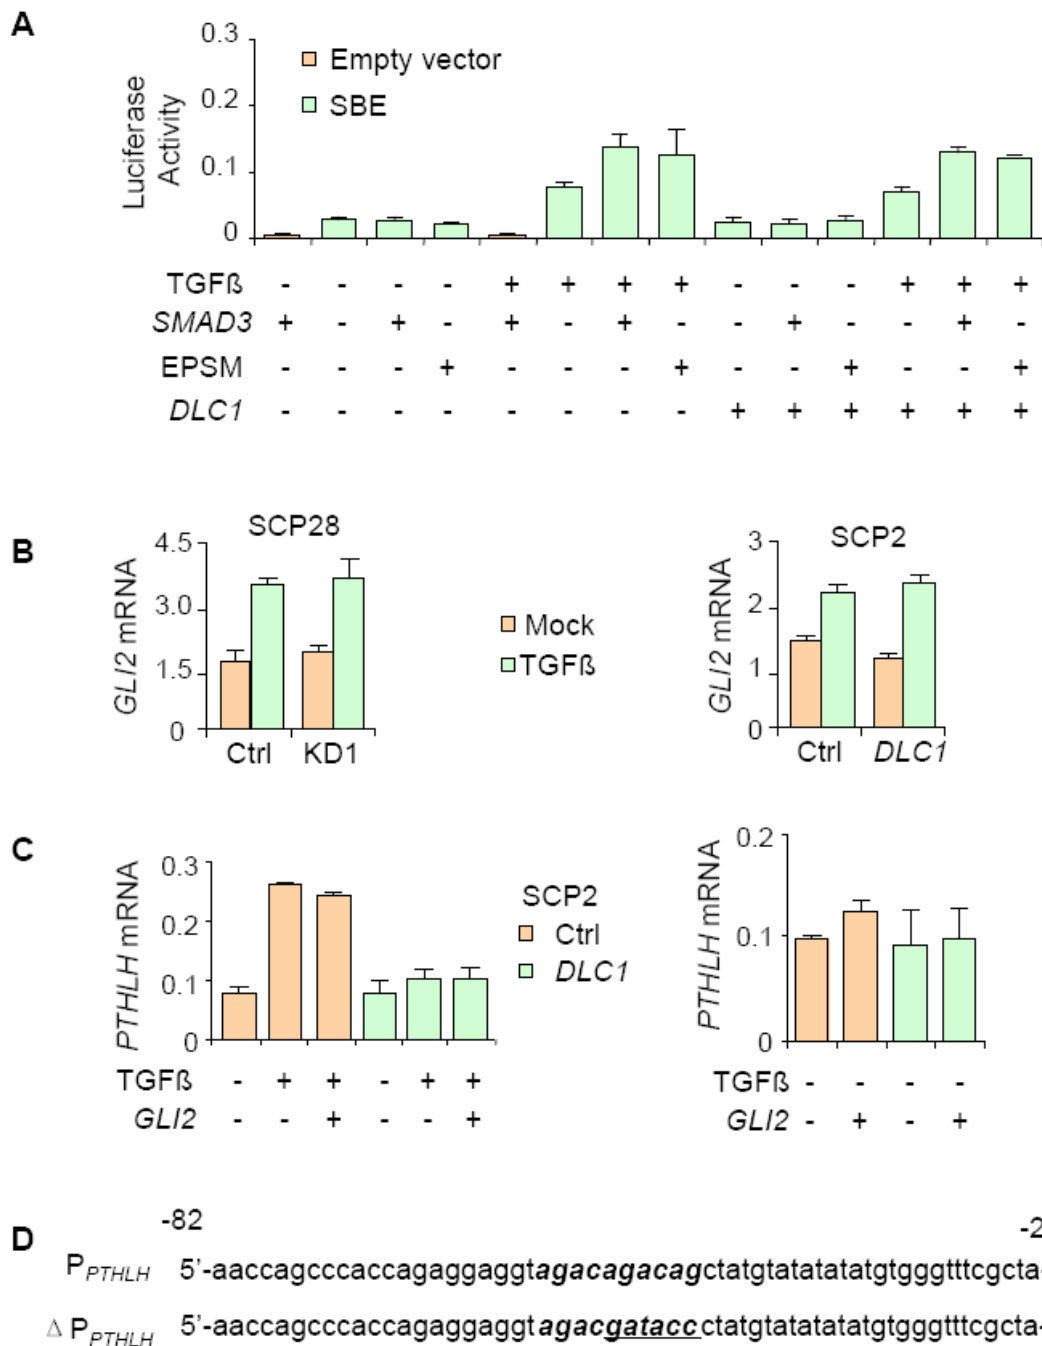

**Figure S7. *PTHLH* is a direct target of SMADs.** (A) SMAD-binding site (SBE) luciferase reporter assays for TGFβ treatment, wild type and EPSM mutant *SMAD3*, and *DLC1* OE (n=3). (B) *GLI2* expression levels after *DLC1* KD/OE and TGFβ treatment (n=3). (C) *PTHLH* expression levels after *DLC1* OE, TGFβ treatment and *GLI2* OE (n=3). (D) *PTHLH* promoter sequences. Bold area indicates the SMAD binding site, and underline indicates the mutated nucleotides in the promoter mutant.

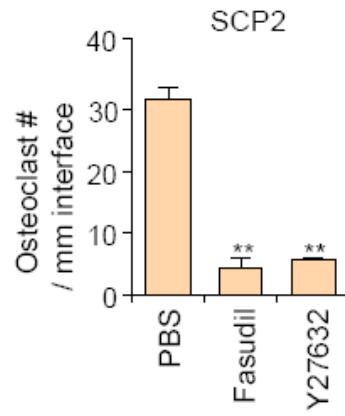

**Figure S8. ROCK inhibitors Fasudil and Y27632 inhibited osteoclast maturation in the bone metastases by SCP2.**

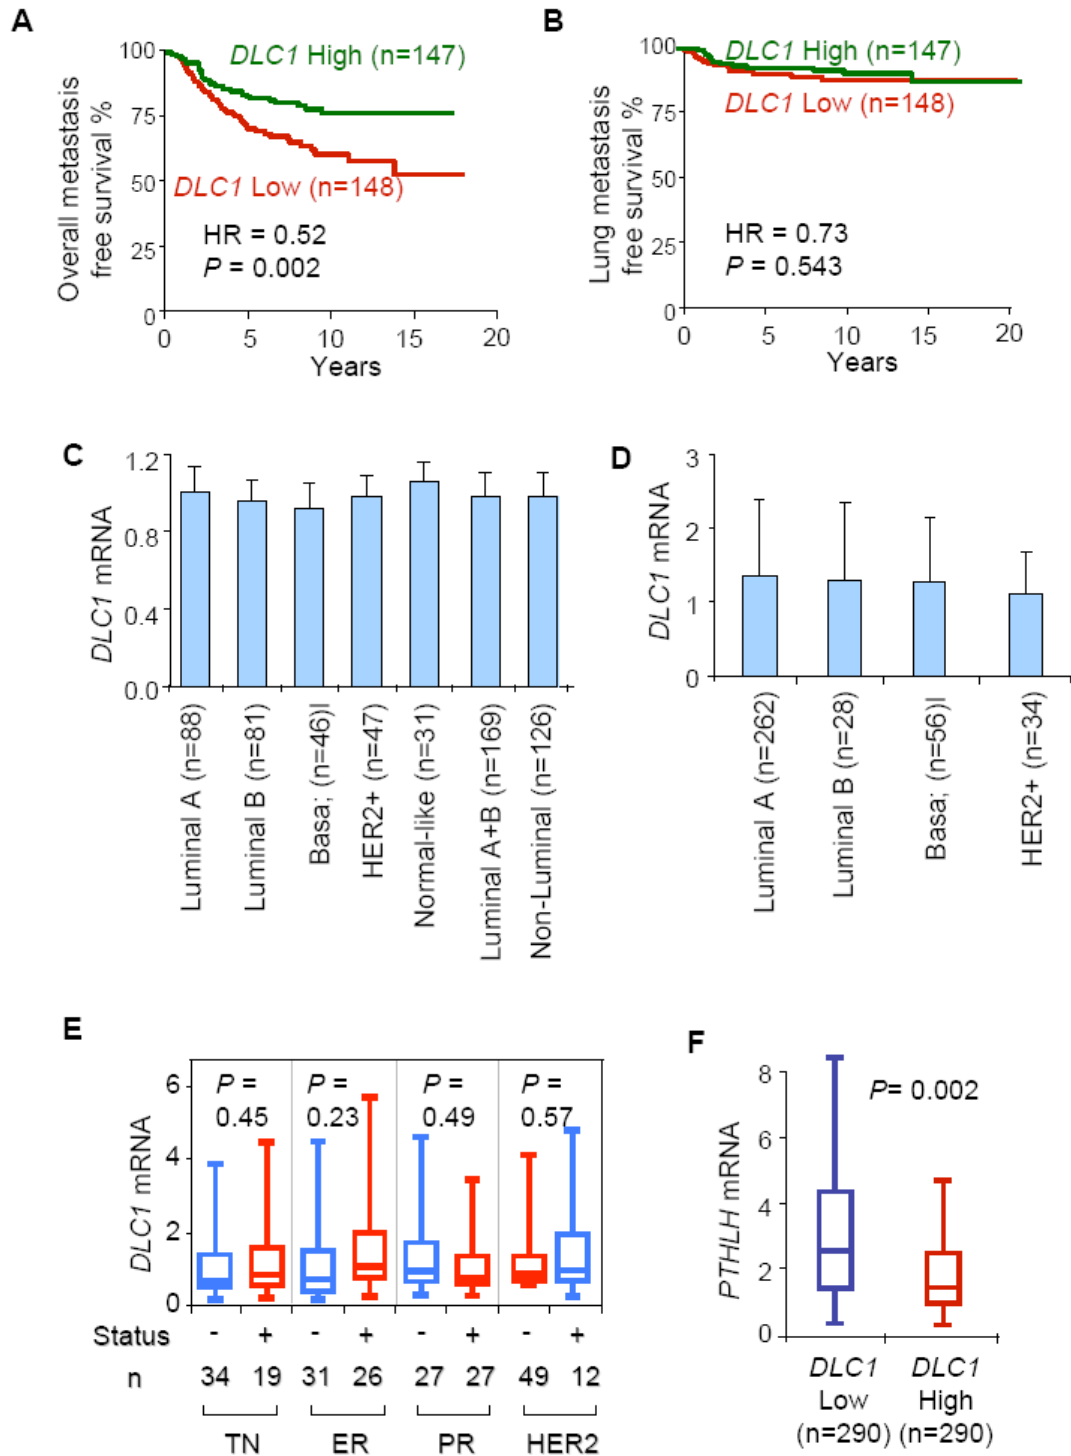

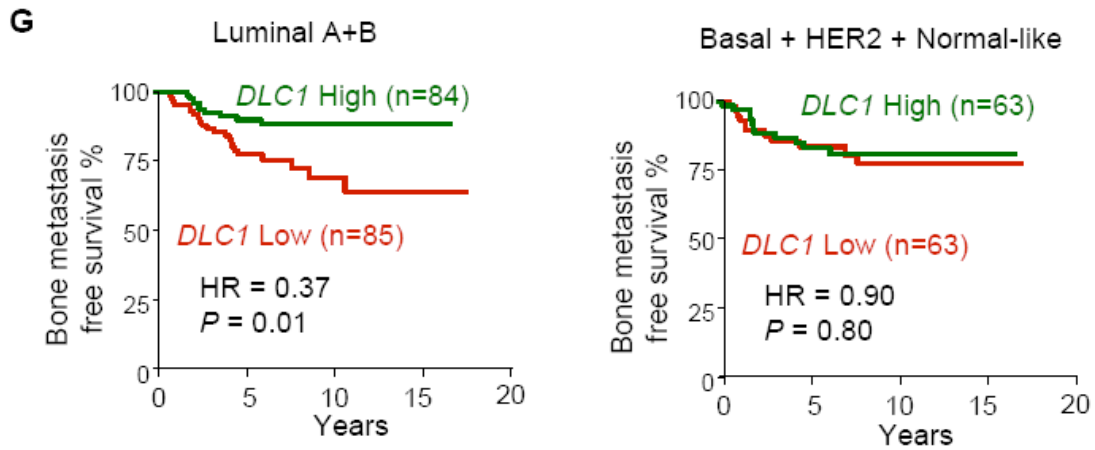

**Figure S9. Correlation of *DLC1* expression with *PTHLH* and clinical parameters.** (A) Overall metastasis analyses of the NKI tumors with different *DLC1* expression. (B) Lung metastasis analyses of the NKI tumors with different *DLC1* expression. (C) The expression of *DLC1* in the NKI tumors of different molecular subtypes. (D) The expression of *DLC1* in the TCGA breast tumors of different molecular subtypes. (E) The expression of *DLC1* in the Qilu tumors with different ER, PR, HER2 expression or triple negative (TN) status. (F) Correlation of *DLC1* and *PTHLH* expression in the TCGA tumors. (G) The association of *DLC1* expression to bone metastasis in the NKI tumors of luminal type or non-luminal type.

## SUPPLEMENTAL TABLES

**Table S1. The expression of genes that are upregulated by TGF $\beta$  but reversed by *DLC1* in SCP2.**

| Probe       | Gene Symbol | Expression |                        |       |                      | TGF $\beta$ response |          |                                |
|-------------|-------------|------------|------------------------|-------|----------------------|----------------------|----------|--------------------------------|
|             |             | Vector     | Vector+<br>TGF $\beta$ | DLC1  | DLC1+<br>TGF $\beta$ | In Vector*           | In DLC1* | Response<br>Ratio <sup>#</sup> |
| 211756_at   | PTHLH       | 1.86       | 7.29                   | 1.64  | 1.70                 | 3.92                 | 1.03     | 0.26                           |
| 207601_at   | SULT1B1     | 0.23       | 1.04                   | 0.17  | 0.21                 | 4.57                 | 1.29     | 0.28                           |
| 238460_at   | FAM83A      | 1.49       | 4.97                   | 1.18  | 1.21                 | 3.33                 | 1.03     | 0.31                           |
| 201416_at   | SOX4        | 2.77       | 11.70                  | 8.29  | 11.04                | 4.22                 | 1.33     | 0.32                           |
| 243993_at   | AA436887    | 0.38       | 1.34                   | 0.32  | 0.37                 | 3.55                 | 1.14     | 0.32                           |
| 238741_at   | FAM83A      | 0.92       | 3.61                   | 0.85  | 1.10                 | 3.95                 | 1.30     | 0.33                           |
| 226844_at   | MOBKL2B     | 0.33       | 1.10                   | 0.27  | 0.34                 | 3.35                 | 1.28     | 0.38                           |
| 222146_s_at | TCF4        | 0.69       | 1.90                   | 0.55  | 0.58                 | 2.75                 | 1.06     | 0.39                           |
| 239586_at   | FAM83A      | 1.80       | 6.03                   | 1.35  | 1.85                 | 3.34                 | 1.37     | 0.41                           |
| 201417_at   | SOX4        | 6.84       | 25.16                  | 18.34 | 27.60                | 3.68                 | 1.50     | 0.41                           |
| 213668_s_at | SOX4        | 0.56       | 1.82                   | 1.20  | 1.60                 | 3.23                 | 1.33     | 0.41                           |
| 205387_s_at | CGB         | 0.45       | 1.39                   | 0.64  | 0.83                 | 3.13                 | 1.30     | 0.42                           |
| 225867_at   | VASN        | 0.91       | 2.93                   | 1.26  | 1.73                 | 3.23                 | 1.38     | 0.43                           |
| 235976_at   | SLITRK6     | 0.40       | 1.07                   | 1.97  | 2.28                 | 2.65                 | 1.16     | 0.44                           |
| 212099_at   | RHOB        | 0.65       | 2.40                   | 0.88  | 1.45                 | 3.69                 | 1.65     | 0.45                           |
| 232481_s_at | SLITRK6     | 1.21       | 3.49                   | 5.80  | 7.63                 | 2.88                 | 1.32     | 0.46                           |
| 211844_s_at | NRP2        | 0.54       | 1.53                   | 0.30  | 0.40                 | 2.85                 | 1.33     | 0.47                           |
| 232176_at   | SLITRK6     | 1.31       | 3.36                   | 6.14  | 7.38                 | 2.57                 | 1.20     | 0.47                           |
| 205801_s_at | RASGRP3     | 0.67       | 1.64                   | 0.66  | 0.77                 | 2.45                 | 1.17     | 0.48                           |
| 201170_s_at | BHLHE40     | 5.85       | 21.03                  | 11.50 | 19.79                | 3.59                 | 1.72     | 0.48                           |
| 203753_at   | TCF4        | 1.60       | 4.38                   | 1.33  | 1.80                 | 2.74                 | 1.35     | 0.49                           |
| 238688_at   | TPM1        | 0.46       | 1.70                   | 0.48  | 0.88                 | 3.73                 | 1.84     | 0.49                           |
| 238712_at   | BF801735    | 0.54       | 2.07                   | 0.56  | 1.05                 | 3.82                 | 1.89     | 0.49                           |
| 224650_at   | MAL2        | 20.19      | 5.79                   | 29.59 | 17.08                | 0.29                 | 0.58     | 2.01                           |
| 226189_at   | ITGB8       | 7.53       | 3.03                   | 2.45  | 2.00                 | 0.40                 | 0.81     | 2.02                           |

|              |          |       |      |      |      |      |      |      |
|--------------|----------|-------|------|------|------|------|------|------|
| 209392_at    | ENPP2    | 1.30  | 0.51 | 0.50 | 0.40 | 0.39 | 0.80 | 2.06 |
| 222150_s_at  | PION     | 3.01  | 1.48 | 1.00 | 1.01 | 0.49 | 1.01 | 2.07 |
| 221541_at    | CRISPLD2 | 1.83  | 0.75 | 0.55 | 0.48 | 0.41 | 0.88 | 2.16 |
| 1555310_a_at | PAK6     | 1.60  | 0.60 | 0.94 | 0.78 | 0.38 | 0.82 | 2.18 |
| 211742_s_at  | EVI2B    | 7.94  | 1.89 | 5.50 | 2.90 | 0.24 | 0.53 | 2.21 |
| 206569_at    | IL24     | 1.54  | 0.50 | 0.75 | 0.55 | 0.33 | 0.73 | 2.23 |
| 213142_x_at  | PION     | 5.94  | 2.86 | 1.81 | 1.96 | 0.48 | 1.08 | 2.25 |
| 210143_at    | ANXA10   | 2.83  | 0.92 | 1.39 | 1.09 | 0.32 | 0.78 | 2.41 |
| 235921_at    | AI761207 | 11.12 | 2.76 | 5.44 | 3.29 | 0.25 | 0.60 | 2.43 |
| 222717_at    | SDPR     | 4.15  | 0.96 | 1.07 | 0.65 | 0.23 | 0.61 | 2.63 |
| 212558_at    | SPRY1    | 3.61  | 0.66 | 4.26 | 2.28 | 0.18 | 0.53 | 2.91 |
| 206022_at    | NDP      | 1.14  | 0.37 | 0.22 | 0.24 | 0.32 | 1.10 | 3.42 |

\* TGF $\beta$  response in *DLC1*-overexpressing or control cells was calculated as the gene expression level in TGF $\beta$ -treated cells divided by that in untreated cells.

# TGF $\beta$  response ratio was calculated as the TGF $\beta$  response in *DLC1*-overexpressing cells divided by that in control cells.

**Table S2. Clinical information of the Qilu cohort.**

| ID | Age | follow up time<br>(months) | met | ER | PR | HER2 | TN | DLC1 | PTHLH |
|----|-----|----------------------------|-----|----|----|------|----|------|-------|
| 2  | 54  | 18.3                       | 1   | 1  | 0  | 0    | 0  | 0.46 | 0.50  |
| 5  | 71  | 91.6                       | 0   | 0  | 0  | 1    | 0  | 0.47 | 0.50  |
| 6  | 58  | 47.3                       | 1   | 0  | 0  | 0    | 1  | 0.32 | 0.59  |
| 7  | 56  | 46.9                       | 0   | 0  | 0  | 1    | 0  | 0.13 | 1.66  |
| 11 | 53  | 44.4                       | 0   | 1  | 1  | 1    | 0  | 0.45 | 0.52  |
| 12 | 53  | 41.2                       | 0   | 0  | 0  | 0    | 1  | 0.27 | 0.40  |
| 13 | 50  | 120.8                      | 0   | 1  | 1  | 0    | 0  | 0.55 | 0.06  |
| 14 | 64  | 60.4                       | 1   | 0  | 0  | 0    | 1  | 2.53 | 0.02  |
| 17 | 45  | 6.4                        | 0   | 0  | 0  | 0    | 1  | 0.99 | 0.25  |
| 19 | 37  | 48.0                       | 0   | 0  | 0  | 0    | 1  | 0.49 | 0.47  |
| 23 | 45  | 21.4                       | 0   | 0  |    | 0    |    | 1.74 | 0.08  |
| 25 | 45  | 21.4                       | 0   | 0  | 1  | 0    | 0  | 0.12 | 1.96  |
| 28 | 72  | 106.6                      | 0   | 0  | 0  | 1    | 0  | 1.78 | 0.02  |
| 29 | 43  | 41.7                       | 0   | 1  | 1  | 1    | 0  | 0.51 | 0.27  |
| 30 | 67  | 125.2                      | 0   |    |    | 0    |    | 0.53 | 0.08  |
| 31 | 59  | 87.5                       | 0   | 1  | 1  | 0    | 0  | 0.28 | 0.77  |
| 32 | 42  | 82.0                       | 0   | 1  | 1  | 0    | 0  | 0.20 | 1.29  |
| 35 | 47  | 43.4                       | 0   | 0  | 0  | 0    | 1  | 0.67 | 0.29  |
| 36 | 64  | 12.1                       | 1   | 1  |    | 0    |    | 0.52 | 0.26  |
| 39 | 47  | 15.4                       | 1   |    |    | 0    |    | 0.76 | 0.29  |
| 42 | 59  | 53.4                       | 0   | 1  | 1  | 0    | 0  | 0.77 | 0.14  |
| 43 | 37  | 37.9                       | 0   | 1  | 1  | 0    | 0  | 1.00 | 0.07  |
| 44 | 49  | 78.2                       | 0   | 0  | 0  | 0    | 1  | 1.73 | 0.91  |
| 47 | 59  | 128.2                      | 0   | 1  | 1  | 0    | 0  | 0.54 | 0.06  |
| 48 | 66  | 39.3                       | 0   | 1  |    | 1    |    | 6.23 | 0.03  |
| 50 | 56  | 46.9                       | 0   | 1  | 1  | 0    | 0  | 1.43 | 0.19  |
| 53 | 69  | 41.9                       | 1   | 0  | 1  | 0    | 0  | 0.10 | 0.91  |
| 54 | 38  | 22.8                       | 0   | 1  | 1  | 0    | 0  | 0.53 | 0.08  |
| 57 | 57  | 95.3                       | 0   | 1  | 1  | 0    | 0  | 1.40 | 0.19  |
| 59 | 41  | 52.8                       | 0   | 0  | 0  | 0    | 1  | 0.32 | 0.61  |
| 63 | 63  | 29.6                       | 1   | 0  | 0  | 0    | 1  | 0.13 | 1.36  |
| 66 | 49  | 48.1                       | 0   | 0  | 0  | 0    | 1  | 1.53 | 0.05  |
| 72 | 48  | 7.4                        | 1   | 0  | 0  | 0    | 1  | 0.02 | 1.42  |
| 77 | 48  | 26.0                       | 0   | 0  | 1  | 1    | 0  | 0.10 | 2.11  |
| 78 | 58  | 12.1                       | 1   | 0  | 0  | 0    | 1  | 0.52 | 0.07  |
| 79 | 40  | 41.7                       | 0   | 0  | 0  | 0    | 1  | 0.20 | 1.24  |
| 80 | 45  | 122.5                      | 0   | 1  | 1  | 0    | 0  | 2.66 | 0.02  |
| 81 | 46  | 58.7                       | 1   |    |    | 0    |    | 0.01 | 0.51  |



|     |    |       |   |   |   |   |   |      |      |
|-----|----|-------|---|---|---|---|---|------|------|
| 82  | 55 | 5.5   | 0 | 1 | 1 |   | 0 | 1.21 | 0.20 |
| 84  | 66 | 49.8  | 0 | 0 | 0 | 1 | 0 | 0.56 | 0.33 |
| 86  | 46 | 87.5  | 0 | 0 | 0 | 0 | 1 | 0.25 | 0.78 |
| 87  | 55 | 109.0 | 0 |   |   | 0 |   | 0.91 | 0.06 |
| 87  | 45 | 55.3  | 0 | 0 | 1 | 0 | 0 | 1.29 | 0.02 |
| 89  | 72 | 110.7 | 0 | 0 | 0 | 0 | 1 | 1.45 | 0.05 |
| 91  | 45 | 21.4  | 0 | 1 | 1 |   | 0 | 0.15 | 0.56 |
| 92  | 57 | 31.9  | 0 | 0 | 0 | 1 | 0 | 1.78 | 0.03 |
| 94  | 71 | 91.6  | 0 | 1 | 1 | 0 | 0 | 1.27 | 0.21 |
| 95  | 40 | 41.7  | 0 | 0 | 0 | 0 | 1 | 0.34 | 0.99 |
| 96  | 51 | 123.8 | 0 | 0 | 0 | 0 | 1 | 0.44 | 0.52 |
| 98  | 40 | 25.9  | 1 | 1 | 1 | 0 | 0 | 0.37 | 0.52 |
| 102 | 57 | 46.0  | 0 | 1 | 1 | 0 | 0 | 0.15 | 1.34 |
| 105 | 37 | 71.9  | 0 | 1 | 1 | 0 | 0 | 0.56 | 0.04 |
| 106 | 69 | 21.1  | 1 |   |   | 0 |   | 0.28 | 0.05 |
| 108 | 50 | 92.5  | 0 |   |   | 1 |   | 0.29 | 0.67 |
| 110 | 64 | 134.1 | 0 | 1 | 1 | 1 | 0 | 0.76 | 0.30 |
| 113 | 45 | 12.1  | 1 | 0 | 0 | 0 | 1 | 0.49 | 0.39 |
| 114 | 57 | 106.6 | 0 | 1 | 1 | 1 | 0 | 0.21 | 1.14 |
| 121 | 52 | 14.9  | 1 | 0 | 0 |   |   | 0.10 | 2.64 |
| 122 | 66 | 51.6  | 0 | 1 | 1 | 0 | 0 | 0.78 | 0.12 |
| 123 | 59 | 103.3 | 0 | 1 | 0 | 0 | 0 | 4.93 | 0.02 |
| 124 | 36 | 33.1  | 1 | 1 | 1 | 0 | 0 | 0.62 | 0.29 |
| 125 |    | 41.7  | 0 | 0 | 1 | 0 | 0 | 1.11 | 0.26 |
| 126 | 43 | 112.8 | 0 |   |   | 0 |   | 0.83 | 0.11 |
| 132 |    | 50.6  | 0 | 0 | 0 | 0 | 1 | 0.49 | 0.34 |
| N1* |    |       |   |   |   |   |   | 4.97 |      |
| N2  |    |       |   |   |   |   |   | 1.99 |      |
| N3  |    |       |   |   |   |   |   | 6.01 |      |
| N4  |    |       |   |   |   |   |   | 4.61 |      |
| N5  |    |       |   |   |   |   |   | 2.30 |      |
| N6  |    |       |   |   |   |   |   | 3.43 |      |
| N7  |    |       |   |   |   |   |   | 1.57 |      |
| N8  |    |       |   |   |   |   |   | 3.35 |      |
| N9  |    |       |   |   |   |   |   | 0.50 |      |

---

\* N1-N9 are paracancerous normal tissues.

## SUPPLEMENTAL EXPERIMENTAL PROCEDURES

### Cell lines

4T1 and MCF10 cell line series were obtained from Dr. Fred Miller (3, 4). The human lung endothelial cell line ST1.6R was from Dr. C.J. Kirkpatrick (5). MDA-MB-231 derivatives, 4T1, C2C12 and RAW264.7 were maintained in Dulbecco's Modified Eagle's Medium (DMEM, Invitrogen) with 10% fetal bovine serum (FBS, HyClone), 100 U/mL penicillin and 100 µg/mL streptomycin (Invitrogen). MCF10 series were cultured in DMEM/F12 medium supplemented with 5% horse serum, 10 µg/mL insulin (Roche), 100 ng/mL cholera toxin (Merck), 0.5 µg/mL hydrocortisone (Merck), 20 ng/mL epidermal growth factor (Invitrogen), 100 U/mL penicillin and 100 µg/mL streptomycin. ST1.6R were maintained in basal medium 199 (Invitrogen) with 20% FBS and 50 µg/mL endothelial growth factor supplements (Sigma). The human bone marrow endothelial cell line HBMEC-60 was maintained in basal medium 200 (Invitrogen) with 20% FBS and low serum growth supplements (Invitrogen). For bioluminescent imaging, cell lines were stably transfected with a fusion protein construct encoding the firefly luciferase.

### Primers

The mouse *DLC1* cDNA was amplified using primers 5'-ACCTTAATGTGTAGAGACGAGCCGG-3' (sense) and 5'-TGCTTCATTTCGCGTCGGTCA-3' (anti-sense). The primers for human *DLC1* mRNA qPCR were 5'-CCGTGCTTGATGTGCAGAAAG-3' (sense) and 5'-ACCAGTTGCCCGTAGCCAAT-3' (antisense). The primers for mouse *Dlc1* mRNA qPCR were 5'-CGGACACCATGATCCTAACA-3' (sense) and 5'-ATACTGGGGGAAACCAGTCA-3' (antisense). The primers for human *PTHLH* mRNA qPCR were 5'-ACAGTTGGAGTAGCCGGTTG-3' (sense) and 5'-CCCTTGTCATGGAGGAGCTG-3' (antisense). The primers for human *IL11* mRNA qPCR were 5'-AGCGGACAGGGAAGGGTTA-3' (sense) and 5'-CTGTATCTGGCCACAGGCTC-3' (antisense). The primers for human *CTGF* mRNA qPCR were 5'-CCTGCAGGCTAGAGAAGCAG-3' (sense) and 5'-TGGAGATTTTGGGAGTACGG-3' (antisense). The primers for human *JAG1* mRNA qPCR were 5'-ATGGGCCCCGAATGTAACAG-3' (sense) and 5'-ATCACAGTACAGGCCTTGCC-3' (antisense). The primers for human *Smad4* mRNA qPCR were 5'-CCATCCAGCATCCACCAAGT-3' (sense) and

5'- GGCCCTGATGCTATCTGCAA-3' (antisense). The primers for human *CDKN1A* mRNA qPCR were 5'- AGTCAGTTCCTTGTGGAGCC-3' (sense) and 5'- CATTAGCGCATCACAGTCGC-3' (antisense). The primers for human *GLI2* mRNA qPCR were 5'- CACGCTCTCCATGATCTCTG-3' (sense) and 5'- CCCCTCTCCTTAAGGTGCTC-3' (antisense). The ChIP-qPCR primers for human *PTH1H* promoter were 5'-CCCACCAGAGGAGGTAGACA-3' (sense) and 5'- CCTTTCGTTCCAGAGCCACT-3' (antisense). The ChIP-qPCR primers for human *IL11* promoter were 5'- TTGAGCCTGAGTGTCTGCTC-3' (sense) and 5'- AGGGCACGGAAGGAAAAGTT-3' (antisense). The primers for *DLC1* gene copy number qPCR were 5'-CAGCCAGCGCTCCTTTAGGTGT-3' (sense) and 5'-ACAGAGCCGTTGTTACAGAGGGT-3' (antisense). The primers for mouse *Rankl* mRNA (6), for mouse *Opg* mRNA qPCR (7), and for *DLC1* promoter bisulfite sequencing (8) were previously described.

#### **Colony formation assay**

$5 \times 10^3$  or  $10^4$  cells were suspended in 0.5 mL of 0.3% low melting point agar (Invitrogen) in DMEM containing 10% FBS and this suspension was overlaid on pre-solidified 0.6% agar in the same medium in 24-well plates. Normal growth medium was gently layered over the cultures every 4 days for 14 days. The colonies were stained with 0.1% crystal violet for 1 h at room temperature and counted under an inverted microscope.

#### **Migration assay**

Cells were seeded on 6-well plates. When the cells reached 100% confluence, they were starved in DMEM containing 0.5% FBS. The cell monolayer was scraped with a pipette tip from the center of each well and marked at the injury line. Photomicrographs of the wounds were taken at 0, 4, and 30 h.

#### **Transwell invasion assay**

$5 \times 10^4$  or  $10^5$  serum-starved cancer cells were resuspended in serum-free medium and seeded in the inserts (Costar) containing 8  $\mu$ m pores with 3 mg/mL matrigel (Becton, Dickinson and Company). These inserts were placed in wells that contained medium with 10% FBS for 12 or 24 h after seeding. Then the medium was aspirated, and 350  $\mu$ L of trypsin was added into the wells to trypsinize the cells that had passed through the pores, followed by serum neutralization of the trypsin. The trypsinized cells were centrifuged for 4

min at 1000 rpm, resuspended in 100  $\mu$ L phosphate-buffered saline (PBS), and counted using a hemacytometer.

#### **Endothelial adhesion assay**

The endothelium cells were grown to confluence in 24-well plates, treated at 37°C with 10 ng/mL TNF $\alpha$  for 6 h and then washed twice with PBS. Then  $2 \times 10^5$  of firefly luciferase-labeled cancer cells were added to the endothelial monolayer and incubated for 1 h. Non-adherent cancer cells were removed from the plate by gentle washing twice with PBS, and the monolayer-associated cancer cells was quantitated by luciferase reporter assay using a pre-established standard curve of bioluminescent intensities of  $10^2$ ,  $10^3$ ,  $10^4$ ,  $10^5$ ,  $10^6$  cancer cells.

#### **Trans-endothelial migration assay**

The endothelium cells were grown to confluence on transwell polycarbonate filters (8  $\mu$ m) and washed with PBS before seeding of  $5 \times 10^4$  cancer cells on top of the endothelial layers. These transwell inserts were placed in wells containing culture medium with 10 ng/mL EGF for 24 h. Cancer cells passed through the pores was collected and counted according to the above protocol of transwell invasion assays.

#### **Luciferase assay**

The cells were transfected by the target reporter plasmids and a Renilla luciferase control plasmid with Lipofectamine™ 2000 (Invitrogen). After 24 h, media was removed and 50  $\mu$ L lysis buffer was added into each well. The 24-well plate was rocked for 1 h at room temperature and then two aliquots of 10  $\mu$ L lysate per well was mixed with 30 $\mu$ L luciferin substrate solution and 30  $\mu$ L renilla luciferase substrate solution, respectively. The luminescence intensities were measured using a Lumat LB 9507 luminometer (Berthold).

## SUPPLEMENTAL REFERENCES

1. Kang Y, et al. A multigenic program mediating breast cancer metastasis to bone. *Cancer Cell*. 2003; 3:537-549.
2. Padua D, et al. TGFbeta primes breast tumors for lung metastasis seeding through angiopoietin-like 4. *Cell*. 2008; 133:66-77.
3. Strickland LB, Dawson PJ, Santner SJ, and Miller FR. Progression of premalignant MCF10AT generates heterogeneous malignant variants with characteristic histologic types and immunohistochemical markers. *Breast Cancer Res Treat*. 2000; 64:235-240.
4. Dexter DL, et al. Heterogeneity of tumor cells from a single mouse mammary tumor. *Cancer Res*. 1978; 38:3174-3181.
5. Krump-Konvalinkova V, et al. Generation of human pulmonary microvascular endothelial cell lines. *Lab Invest*. 2001; 81:1717-1727.
6. Bishop KA, et al. Mouse Rankl expression is regulated in T cells by c-Fos through a cluster of distal regulatory enhancers designated the T cell control region. *J Biol Chem*. 2011; 286:20880-20891.
7. Lee JH, et al. Trolox prevents osteoclastogenesis by suppressing RANKL expression and signaling. *J Biol Chem*. 2009; 284:13725-13734.
8. Seng TJ, et al. The major 8p22 tumor suppressor DLC1 is frequently silenced by methylation in both endemic and sporadic nasopharyngeal, esophageal, and cervical carcinomas, and inhibits tumor cell colony formation. *Oncogene*. 2007; 26:934-944.
